# Supplementary material for: Discovering Anti-platelet Drug Combinations with an Integrated Model of Activator-Inhibitor Relationships, Activator-Activator Synergies and Inhibitor-Inhibitor Synergies
Source: PLOS journal article supplement (doi:10.1371/journal.pcbi.1004119), 2015-04-15

Sample R code used to generate heatmaps displayed in Figure 1.

### VISUALIZE DATA AS HEATMAP ###

# call the library "gplots"

library("gplots")

# read in the file

Normalized <- read.delim("~/Desktop/UCD/Figure/Figure1/Normalized_Triangular/Normalized.txt", header=F)

# convert it to matrix with the as.matrix command and type:

data <- as.matrix(Normalized)

# write heatmap to pdf

pdf("<filename.pdf>")

heatmap.2(data, Colv=FALSE, Rowv=FALSE, col=redgreen(75), scale="none", dendrogram = c("none"), trace=c("none"), sepwidth=c(0.5,0.5), margins=c(5,5),cexRow=0.4,cexCol=1, cellnote=format(data,digit=3), notecex=1.5, keysize = 1, density.info=c("none"),notecol="white")

dev.off()

Data input text “Normalized.txt” file contents

0 0 0.31 0.16 -0.06 0

-0.12 0 0 0.17 -0.18 -0.1

0.05 0.17 0 0 -0.15 0

0.13 0.34 0.05 0 0 -0.25

-0.02 0.06 -0.01 0.01 0 0

Output prior to editing in Fig. 1. Editing ensures that colours of each cell are not altered.


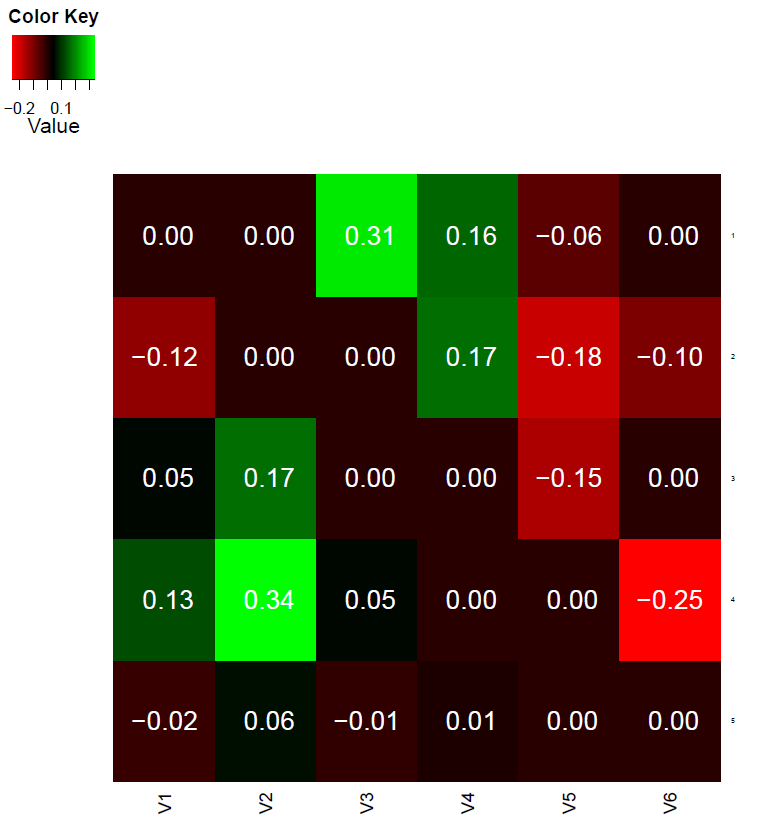

Supplement: S17 (10.1371/journal.pcbi.1004119.s017) [file journal.pcbi.1004119.s017]
